# Supplementary material
Source: PubMed Central journal article supplement (PMC2681402)
Supplement: supp_M800666-JLR200_Suppl_Table.pdf [file supp_M800666-JLR200_Suppl_Table.pdf]

Supplemental Table 1 Levels of individual ceramides and dihydroceramides

|         |             | Control shRNA                  |                                | FA2H shRNA                     |                                |
|---------|-------------|--------------------------------|--------------------------------|--------------------------------|--------------------------------|
|         |             | No db-cAMP                     | 1 mM db-cAMP                   | No db-cAMP                     | 1 mM db-cAMP                   |
| Cer     | 14:0        | 0.64 ± 0.23                    | 1.20 ± 0.19                    | 0.38 ± 0.02                    | 2.91 ± 2.68                    |
|         | 16:0        | 4.05 ± 0.77                    | 7.09 ± 0.91                    | 3.68 ± 1.47                    | 4.76 ± 1.01                    |
|         | 18:0        | 0.44 ± 0.40                    | 0.66 ± 0.14                    | 0.32 ± 0.11                    | 0.65 ± 0.41                    |
|         | 18:1        | 1.74 ± 0.95                    | 2.26 ± 0.06                    | 0.89 ± 0.10                    | 2.36 ± 1.51                    |
|         | 20:0        | 2.11 ± 1.38                    | 2.21 ± 0.28                    | 1.29 ± 0.28                    | 2.40 ± 1.59                    |
|         | 20:1        | 0.24 ± 0.04                    | 0.52 ± 0.01                    | 0.20 ± 0.10                    | 0.28 ± 0.07                    |
|         | 20:4        | 0.02 ± 0.01                    | 0.02 ± 0.01                    | 0.02 ± 0.01                    | 0.02 ± 0.01                    |
|         | 22:0        | 5.09 ± 0.21                    | 5.17 ± 0.89                    | 3.85 ± 0.89                    | 5.51 ± 0.27                    |
|         | 22:1        | 2.24 ± 0.31                    | 2.26 ± 0.51                    | 2.23 ± 0.74                    | 2.06 ± 0.32                    |
|         | 24:0        | 64.27 ± 9.76                   | 48.62 ± 4.84                   | 46.28 ± 3.25                   | 56.33 ± 10.50                  |
|         | 24:1        | 39.53 ± 3.95                   | 40.86 ± 9.23                   | 43.01 ± 8.84                   | 46.69 ± 4.72                   |
|         | 26:0        | 5.66 ± 1.34                    | 1.15 ± 0.30                    | 2.14 ± 0.20                    | 1.62 ± 0.73                    |
|         | 26:1        | 6.90 ± 0.30                    | 2.39 ± 0.60                    | 6.73 ± 0.55                    | 3.32 ± 0.73                    |
| hFA-Cer | h12:0       | bdl                            | bdl                            | bdl                            | bdl                            |
|         | h14:0       | (7.68 ± 3.69)x10 <sup>-1</sup> | (7.61 ± 1.71)x10 <sup>-1</sup> | (6.18 ± 0.54)x10 <sup>-1</sup> | (5.76 ± 0.98)x10 <sup>-1</sup> |
|         | h16:0       | (9.15 ± 0.10)x10 <sup>-1</sup> | (4.10 ± 0.27)x10 <sup>-1</sup> | (2.03 ± 0.42)x10 <sup>-1</sup> | (3.50 ± 0.83)x10 <sup>-1</sup> |
|         | h18:0       | (2.98 ± 2.29)x10 <sup>-1</sup> | (4.45 ± 1.37)x10 <sup>-1</sup> | (7.43 ± 1.49)x10 <sup>-2</sup> | (2.48 ± 0.43)x10 <sup>-1</sup> |
|         | h18:1       | (1.83 ± 1.28)x10 <sup>-1</sup> | (2.60 ± 1.04)x10 <sup>-1</sup> | (2.45 ± 0.39)x10 <sup>-2</sup> | (9.61 ± 4.12)x10 <sup>-2</sup> |
|         | h20:0       | (1.80 ± 0.75)x10 <sup>-1</sup> | (4.52 ± 0.46)x10 <sup>-1</sup> | (6.39 ± 0.42)x10 <sup>-2</sup> | (17.1 ± 0.99)x10 <sup>-2</sup> |
|         | h22:0       | (0.96 ± 0.71)x10 <sup>-2</sup> | (1.70 ± 0.54)x10 <sup>-2</sup> | (0.30 ± 0.13)x10 <sup>-2</sup> | (0.72 ± 0.19)x10 <sup>-2</sup> |
|         | h24:0       | (2.77 ± 0.73)x10 <sup>-2</sup> | (1.36 ± 0.40)x10 <sup>-2</sup> | (1.18 ± 0.38)x10 <sup>-2</sup> | (1.14 ± 0.57)x10 <sup>-2</sup> |
|         | h24:1       | (7.17 ± 3.15)x10 <sup>-2</sup> | (1.47 ± 0.92)x10 <sup>-2</sup> | (4.93 ± 1.07)x10 <sup>-2</sup> | (2.63 ± 1.58)x10 <sup>-2</sup> |
|         | h26:0       | bdl                            | bdl                            | bdl                            | bdl                            |
|         | h26:1       | bdl                            | bdl                            | bdl                            | bdl                            |
| h28:0   | bdl         | bdl                            | bdl                            | bdl                            |                                |
| DHC     | 12:0        | bdl                            | bdl                            | bdl                            | bdl                            |
|         | 14:0        | 1.43 ± 0.42                    | 1.63 ± 0.76                    | 1.48 ± 0.21                    | 1.06 ± 0.07                    |
|         | 16:0        | 6.34 ± 1.96                    | 6.66 ± 1.55                    | 7.04 ± 1.80                    | 3.45 ± 0.70                    |
|         | 18:0        | 0.24 ± 0.15                    | 0.24 ± 0.06                    | 0.14 ± 0.04                    | 0.12 ± 0.07                    |
|         | 18:1        | 0.11 ± 0.09                    | 0.09 ± 0.03                    | 0.04 ± 0.00                    | 0.10 ± 0.06                    |
|         | 20:0        | 0.18 ± 0.03                    | 0.11 ± 0.03                    | 0.12 ± 0.05                    | 0.09 ± 0.03                    |
|         | 20:1        | 0.07 ± 0.03                    | 0.06 ± 0.01                    | 0.04 ± 0.02                    | 0.07 ± 0.02                    |
|         | 22:0        | 0.61 ± 0.16                    | 0.24 ± 0.05                    | 0.54 ± 0.12                    | 0.25 ± 0.01                    |
|         | 22:1        | 0.24 ± 0.09                    | 0.18 ± 0.05                    | 0.21 ± 0.04                    | 0.19 ± 0.05                    |
|         | 24:0        | 1.91 ± 0.64                    | 0.21 ± 0.05                    | 1.46 ± 0.44                    | 0.38 ± 0.11                    |
|         | 24:1        | 2.45 ± 0.15                    | 1.24 ± 0.45                    | 3.40 ± 1.20                    | 1.10 ± 0.18                    |
|         | 26:0        | 0.20 ± 0.16                    | 0.03 ± 0.01                    | 0.05 ± 0.01                    | 0.10 ± 0.05                    |
| 26:1    | 0.80 ± 0.71 | 0.13 ± 0.02                    | 0.40 ± 0.05                    | 0.24 ± 0.12                    |                                |
| hFA-DHC | h14:0       | (2.61 ± 1.91)x10 <sup>-2</sup> | bdl                            | (3.55 ± 2.35)x10 <sup>-2</sup> | bdl                            |
|         | h16:0       | (1.01 ± 0.73)x10 <sup>-1</sup> | (2.95 ± 0.70)x10 <sup>-1</sup> | (2.68 ± 1.58)x10 <sup>-2</sup> | (1.50 ± 0.79)x10 <sup>-1</sup> |
|         | h18:0       | bdl                            | bdl                            | bdl                            | bdl                            |
|         | h18:1       | (1.38 ± 1.18)x10 <sup>-1</sup> | (1.16 ± 0.27)x10 <sup>-1</sup> | (2.19 ± 1.3)x10 <sup>-2</sup>  | (8.29 ± 4.70)x10 <sup>-2</sup> |
|         | h20:0       | bdl                            | bdl                            | bdl                            | bdl                            |
|         | h22:0       | bdl                            | bdl                            | bdl                            | bdl                            |
|         | h24:0       | (2.59 ± 0.80)x10 <sup>-3</sup> | (1.36 ± 1.46)x10 <sup>-3</sup> | (5.75 ± 2.45)x10 <sup>-4</sup> | (1.09 ± 0.24)x10 <sup>-3</sup> |
|         | h24:1       | (3.21 ± 1.18)x10 <sup>-3</sup> | (2.57 ± 0.97)x10 <sup>-3</sup> | (4.58 ± 0.24)x10 <sup>-4</sup> | (1.09 ± 0.60)x10 <sup>-3</sup> |
|         | h26:0       | bdl                            | bdl                            | bdl                            | bdl                            |
|         | h26:1       | bdl                            | bdl                            | bdl                            | bdl                            |

The mean ± S.D. (pmole/mg protein) of triplicate measurements are shown. bdl, below detectable level.
